# Supplementary material
Source: publisher figshare collection journal article supplement (https://sage.figshare.com/ndownloader/files/22333095)
Supplement: Supplementary file 1 [file 22333095]

**APPENDIX**

### Interview Lists

| **Role** | | **Organization** | | |  | | **Organization Type** | | **Date of Interview** | |
| --- | --- | --- | --- | --- | --- | --- | --- | --- | --- | --- |
|  | | **Germany** | | |  | |  | |  | |
| Policy expert | | Expert Council of German Foundations on Integration and Migration (SVR) | | |  | | Advisory body | | 5/14/2014 | |
| Policy expert | | German Institute for International and Security Affairs (SWP) | | |  | | Think tank | | 5/15/2014 | |
| Policy expert | | University Duisburg-Essen |  | | | | Research institute | | 5/21/2014* | |
| Public official | | Member of Parliament, Christian-Democratic Union (CDU) |  | | | | Political party | | 5/22/2014 | |
| Public official | | Member of Parliament, Social-Democratic Party, (SPD) |  | | | | Political party | | 5/23/2014 | |
| Policy expert | | Bertelsmann Foundation |  | | | | Think tank | | 5/23/2014 | |
| Official | | Confederation of German Employers' Associations (Bund Deutscher Arbeitgeber, BDA) | | | |  | Employer association | | 5/27/2014* | |
| Official | | German Trade Union Confederation (Deutscher Gewerkschaftsbund, DGB) | | | |  | Trade union | | 6/2/2014 | |
| Policy expert | | Institute for Migration Research and Intercultural Studies University of Osnabrück |  | | | | Research institute | | 7/11/2014* | |
| Commission member | | Head of Expert Commission “Immigration” (formerly) |  | | | | Advisory body | | 7/15/2014 | |
| Policy expert | | University of Hamburg |  | | | | Research institute | | 7/23/2014* | |
|  | **Organization** | | |  | | | | **Organization Type** | | **Date of Interview** | |
|  | **Austria** | | |  | | | |  | |  | |
| Official | Chief executive officer, Austrian Chamber of Business (WKÖ) | | |  | | | | Employer association | | 6/24/2014 | |
| Official | Executive officer, Federation of Austrian Industry (IV) | | |  | | | | Employer lobby group | | 6/26/2014 | |
| Policy expert | Executive officer, International Centre for Migration Policy Development (ICMPD) | | |  | | | | Think tank | | 6/30/2014 | |
| Policy expert | Austrian Integration Fund (ÖIF) | | |  | | | | Advisory body | | 6/30/2014 | |
| Policy expert | Policy expert, University of Vienna | | |  | | | | Research institute | | 7/1/2014 | |
| Public official | Ministry of Labor, Social Affairs and Consumer Protection | | |  | | | | Government | | 7/1/2014 | |
| Public official | Ministry of Interior | | |  | | | | Government | | 7/3/2014 | |
| Policy expert | Danube University Krems | | |  | | | | Research institute | | 7/4/2014 | |
| Official | Austrian Trade Union Federation (ÖGB) | | |  | | | | Trade union | | 7/7/2014 | |
| Official | Ministry for Europe, Integration and Foreign Affairs | | |  | | | | Government | | 7/9/2014 | |

* Phone interview.
